# Supplementary material
Source: Springer Nature journal article supplement (https://www.springermedizin.de/resource/supplementary/13075_2004_1584_MOESM9_ESM.pdf/9690110)
Supplement: MOESM9 [file 9690110]

| Event                      | Placebo | Paracetamol              | Rofecoxib | NSAID L | NSAID all |
|----------------------------|---------|--------------------------|-----------|---------|-----------|
| All-cause discontinuation  | -       | -                        | =         | =       | -         |
| LoE discontinuation        | -       | -                        | =         | +       | =         |
| AE discontinuation         | =       | =                        | =         | -       | -         |
| GI AE discontinuation      | =       | =                        | =         | -       | -         |
| Any AE                     | +       | =                        | =         | -       | -         |
| Treatment-related          | +       | =                        | =         | -       | -         |
| Serious AE                 | -       | =                        | =         | =       | =         |
| GI tolerability            | =       | =                        | =         | -       | -         |
| Nausea                     | -       | =                        | =         | =       | -         |
| Vomiting                   | =       | =                        | =         | -       | -         |
| Abdominal pain             | =       | =                        | -         | -       | -         |
| Dyspepsia                  | +       | =                        | =         | -       | -         |
| Diarrhoea                  | +       | -                        | =         | =       | =         |
| Clinical ulcers and bleeds |         |                          |           | -       | -         |
| Cardiac failure            |         |                          |           | =       | =         |
| Raised creatinine          | =       |                          |           | =       |           |
| Hypertension               | =       |                          | =         | =       | =         |
| Oedema                     | +       | =                        | -         | =       | =         |
| Haemoglobin fall           | =       |                          |           | -       | -         |
| Haematocrit fall           | =       |                          | =         | -       | -         |
| Endoscopic ulcers          | =       |                          |           | -       | -         |
|                            | +       | increased with celecoxib |           |         |           |
|                            | =       | no difference            |           |         |           |
|                            | -       | decreased with celecoxib |           |         |           |
|                            |         | no data                  |           |         |           |
